# Supplementary material
Source: ML conference proceedings conference paper supplement (https://proceedings.mlr.press/v89/chen19e.html)
Supplement: Supplementary file [file chen19e-supp.pdf]

---

## Supplementary Material (AISTATS 2019): Rényi Differentially Private ERM for Smooth Objectives

---

### A Proofs

**Lemma 2.** *Let  $B$  and  $B'$  be mini-batches that differ on the value of one record. Define the operator  $\mathcal{T}_B(\cdot) = \text{Id}(\cdot) - \eta \nabla f_B(\cdot)$  (and similarly for  $B'$ ). Let  $\mathbf{w}$  and  $\mathbf{w}'$  be any two vectors in  $\Theta$ . Let  $\rho = \max\{|1 - \eta\mu|, |1 - \eta L|\}$  (where  $\mu$  is the strong convexity parameter and  $L$  is the smoothness parameter). Then:*

$$\begin{aligned} \|\mathcal{T}_B(\mathbf{w}) - \mathcal{T}_B(\mathbf{w}')\| &\leq \rho \|\mathbf{w} - \mathbf{w}'\| \quad (\text{same batch } B) \\ \|\mathcal{T}_B(\mathbf{w}) - \mathcal{T}_{B'}(\mathbf{w}')\| &\leq \rho \|\mathbf{w} - \mathbf{w}'\| + \frac{2\eta R}{|B|} \end{aligned}$$

where the first equation shows the effect of using the same operator  $\mathcal{T}_B$  and the second equation shows the effect of using  $\mathcal{T}_B$  to update  $\mathbf{w}$  and a different operator  $\mathcal{T}_{B'}$  to update  $\mathbf{w}'$ .

*Proof.* We first consider the case where the same operator  $\mathcal{T}_B$  is applied to both  $\mathbf{w}$  and  $\mathbf{w}'$ , i.e.,  $B = B'$ .

$$\begin{aligned} \|\mathcal{T}_B(\mathbf{w}) - \mathcal{T}_B(\mathbf{w}')\|_2 &= \|\mathbf{w} - \eta \nabla f_B(\mathbf{w}) - (\mathbf{w}' - \eta \nabla f_B(\mathbf{w}'))\|_2 \\ &= \|\mathbf{w} - \mathbf{w}' - \eta(\nabla f_B(\mathbf{w}) - \nabla f_B(\mathbf{w}'))\|_2 \\ &= \left\| \int_0^1 \{\mathbf{I} - \eta \nabla^2 f_B(\mathbf{w}' + s(\mathbf{w} - \mathbf{w}'))\}(\mathbf{w} - \mathbf{w}') \, ds \right\|_2 \\ &\leq \int_0^1 \|\{\mathbf{I} - \eta \nabla^2 f_B(\mathbf{w}' + s(\mathbf{w} - \mathbf{w}'))\}(\mathbf{w} - \mathbf{w}')\|_2 \, ds \\ &\leq \int_0^1 \|\mathbf{I} - \eta \nabla^2 f_B(\mathbf{w}' + s(\mathbf{w} - \mathbf{w}'))\|_2 \|\mathbf{w} - \mathbf{w}'\|_2 \, ds \\ &\leq \int_0^1 \sup_{\mathbf{z}} \|\mathbf{I} - \eta \nabla^2 f_B(\mathbf{z})\|_2 \|\mathbf{w} - \mathbf{w}'\|_2 \, ds \\ &\leq \sup_{\mathbf{z}} \|\mathbf{I} - \eta \nabla^2 f_B(\mathbf{z})\|_2 \|\mathbf{w} - \mathbf{w}'\|_2 \\ &\leq \max\{|1 - \eta\mu|, |1 - \eta L|\} \|\mathbf{w} - \mathbf{w}'\|_2 \\ &= \rho \|\mathbf{w} - \mathbf{w}'\|_2, \end{aligned}$$

where  $\mathbf{z} = \mathbf{w}' + s^*(\mathbf{w} - \mathbf{w}')$ ,  $s^* \in [0, 1]$  is a point on the line segment joining  $\mathbf{w}$  and  $\mathbf{w}'$ .

Now we consider the case where  $B$  and  $B'$  differ by one record. Let  $\xi$  denote the index of record at which  $D$  and  $D'$  differ, i.e.,  $d_i = d'_i$  for all  $i \neq \xi$  and  $d_\xi \neq d'_\xi$ . We introduce the following equality.

$$\begin{aligned} \nabla f_B(\mathbf{w}) - \nabla f_{B'}(\mathbf{w}') &= \frac{1}{|B|} \left\{ \sum_{i \in B} \nabla f(\mathbf{w}, d_i) - \sum_{i \in B'} \nabla f(\mathbf{w}', d'_i) \right\} \\ &= \frac{1}{|B|} \left\{ \nabla f(\mathbf{w}, d_\xi) - \nabla f(\mathbf{w}', d_\xi) + \nabla f(\mathbf{w}', d_\xi) - \nabla f(\mathbf{w}', d'_\xi) + \sum_{i \in B, i \neq \xi} \nabla f(\mathbf{w}, d_i) - \nabla f(\mathbf{w}', d_i) \right\} \\ &= \frac{1}{|B|} \left\{ (\nabla f(\mathbf{w}', d_\xi) - \nabla f(\mathbf{w}', d'_\xi)) + \sum_{i \in B} \nabla f(\mathbf{w}, d_i) - \nabla f(\mathbf{w}', d_i) \right\} \\ &= \nabla f_B(\mathbf{w}) - \nabla f_{B'}(\mathbf{w}') + \frac{1}{|B|} (\nabla f(\mathbf{w}', d_\xi) - \nabla f(\mathbf{w}', d'_\xi)) \end{aligned} \tag{6}$$

Using Equation (6), we get

$$\begin{aligned}
\|\mathcal{T}_B(\mathbf{w}) - \mathcal{T}_{B'}(\mathbf{w}')\|_2 &= \|\mathbf{w} - \eta \nabla f_B(\mathbf{w}) - (\mathbf{w}' - \eta \nabla f_{B'}(\mathbf{w}'))\|_2 \\
&= \|\mathbf{w} - \mathbf{w}' - \eta(\nabla f_B(\mathbf{w}) - \nabla f_{B'}(\mathbf{w}'))\|_2 \\
&= \left\| \mathbf{w} - \mathbf{w}' - \eta(\nabla f_B(\mathbf{w}) - \nabla f_B(\mathbf{w}')) + \frac{\eta}{|B|} (\nabla f(\mathbf{w}', d_\xi) - \nabla f(\mathbf{w}', d'_\xi)) \right\|_2 \\
&\leq \|\mathbf{w} - \mathbf{w}' - \eta(\nabla f_B(\mathbf{w}) - \nabla f_B(\mathbf{w}'))\|_2 + \frac{\eta}{|B|} \|\nabla f(\mathbf{w}', d_\xi) - \nabla f(\mathbf{w}', d'_\xi)\|_2 \\
&\leq \|\mathbf{w} - \mathbf{w}' - \eta(\nabla f_B(\mathbf{w}) - \nabla f_B(\mathbf{w}'))\|_2 + \frac{2\eta R}{|B|} \\
&= \|\mathcal{T}_B(\mathbf{w}) - \mathcal{T}_B(\mathbf{w}')\|_2 + \frac{2\eta R}{|B|} \\
&\leq \rho \|\mathbf{w} - \mathbf{w}'\|_2 + \frac{2\eta R}{|B|},
\end{aligned}$$

where the second to last inequality is due to our requirement on the boundedness of gradient.  $\square$

**Lemma 3.** Define  $H_\alpha(P_1; P_2) = e^{(\alpha-1)D_\alpha(P_1 \| P_2)}$ . Let  $\mathcal{M}_1, \dots, \mathcal{M}_m$  be mechanisms and  $q = [q_1, \dots, q_m]$  be a probability vector over  $1, \dots, m$ . Let  $\mathcal{M}$ , on input  $D$ , sample  $i \sim q$  and return  $\mathcal{M}_i(D)$ . Then

$$H_\alpha(\mathcal{M}(D_1); \mathcal{M}(D_2)) \leq \sum_{j=1}^m q_j H_\alpha(\mathcal{M}_j(D_1); \mathcal{M}_j(D_2)).$$

*Proof.* For each  $j$ , let  $P_1^j$  and  $P_2^j$  be the distributions of  $\mathcal{M}_j(D_1)$  and  $\mathcal{M}_j(D_2)$ , respectively. Let  $P_1$  be the distribution of  $\mathcal{M}(D_1)$  and let  $P_2$  be the distribution of  $\mathcal{M}(D_2)$ .

$$\begin{aligned}
&H_\alpha(\mathcal{M}(D_1); \mathcal{M}(D_2)) \\
&= \mathbb{E}_{x \sim P_2} [P_1(x)^\alpha P_2(x)^{-\alpha}] \\
&= \mathbb{E}_{x \sim P_2} \left[ \left( \frac{\sum_{j=1}^m q_j P_1^j(x)}{\sum_{j=1}^m q_j P_2^j(x)} \right)^\alpha \right] \\
&= \mathbb{E}_{x \sim P_2} \left[ \left( \frac{\sum_{j=1}^m \frac{q_j P_2^j(x)}{\sum_{j'=1}^m q_{j'} P_2^{j'}(x)} \frac{P_1^j(x)}{P_2^j(x)} \right)^\alpha \right] \\
&= \mathbb{E}_{x \sim P_2} \left[ \left( \frac{\sum_{j=1}^m \frac{q_j P_2^j(x)}{P_2(x)} \frac{P_1^j(x)}{P_2^j(x)} \right)^\alpha \right] \\
&\leq \mathbb{E}_{x \sim P_2} \left[ \sum_{j=1}^m \frac{q_j P_2^j(x)}{P_2(x)} \left( \frac{P_1^j(x)}{P_2^j(x)} \right)^\alpha \right] \\
&= \sum_{j=1}^m q_j \mathbb{E}_{x \sim P_2^j} \left[ \left( \frac{P_1^j(x)}{P_2^j(x)} \right)^\alpha \right] \\
&= \sum_{j=1}^m q_j H_\alpha(\mathcal{M}_j(D_1); \mathcal{M}_j(D_2)),
\end{aligned}$$

where the inequality comes from Jensen's inequality (since the function  $z \mapsto z^\alpha$  is convex for  $\alpha > 1$ ) and the second-to-last equality comes from using the definition of expected value.  $\square$

**Proposition 2.** If we run Algorithm 1 for arbitrary number of epochs with a fixed step size  $\eta$ , its sensitivity  $\Delta$  satisfies

$$\Delta \leq \frac{2\eta R}{|B|(1 - \rho^m)},$$

where  $\rho = \max\{|1 - \eta\mu|, |1 - \eta L|\}$ . In particular, when  $m = 1$  and  $\eta = \frac{2}{L+\mu}$ ,  $\Delta \leq \frac{2R}{n\mu}$ .

*Proof.* Let  $D$  and  $D'$  be any two databases that differ on one record. Given a fixed randomness in data permutation, let  $B_0, \dots, B_{m-1}$  and  $B'_0, \dots, B'_{m-1}$  denote  $m$  disjoint mini-batches for  $D$  and  $D'$ , respectively. Then there exists an index  $j$  such that  $B_j \neq B'_j$  and  $B_i = B'_i$  for all  $i \neq j$ .

Algorithm 1 on input  $D$  generates a sequence of solutions  $\mathbf{w}_0, \mathbf{w}_1, \mathbf{w}_2, \dots$ , using the rule  $\mathbf{w}_i = \mathcal{T}_{B_{i-1 \bmod m}}(\mathbf{w}_{i-1})$  (and similarly on input  $D'$  using  $\mathcal{T}_{B'_i}$ ). Define  $\Delta^{(k)}$  as the difference between  $\mathbf{w}_i$  and  $\mathbf{w}'_i$  at the end of  $k^{\text{th}}$  epoch. Provided that the algorithm for input  $D$  and  $D'$  starts with the same initial solution, i.e.,  $\mathbf{w}_0 = \mathbf{w}'_0$ , Lemma 2 says that the first  $j-1$  updates in an epoch will be contractions, the  $j^{\text{th}}$  update will be an expansion, and the remaining  $m-j$  updates will be contractions. Therefore, at the end of the first epoch, we have  $\Delta^{(1)} \leq \rho^{m-j} \frac{2\eta R}{|B|}$ . In the second epoch, there will be again  $j-1$  contractions, one expansion, and  $m-j$  contractions. Hence, we have

$$\begin{aligned} \Delta^{(2)} &\leq \rho^{m-j} \left( \rho \cdot (\rho^{j-1} \Delta^{(1)}) + \frac{2\eta R}{|B|} \right) \\ &= \rho^m \Delta^{(1)} + \rho^{m-j} \frac{2\eta R}{|B|} \\ &\leq \rho^m \cdot \rho^{m-j} \frac{2\eta R}{|B|} + \rho^{m-j} \frac{2\eta R}{|B|}. \end{aligned}$$

Likewise, at the end of the  $k^{\text{th}}$  epoch,

$$\Delta^{(k)} \leq \rho^{m-j} \frac{2\eta R}{|B|} \left( \rho^{(k-1)m} + \rho^{(k-2)m} + \dots + \rho^m + 1 \right).$$

Therefore,

$$\lim_{k \rightarrow \infty} \Delta^{(k)} = \frac{\rho^{m-j} 2\eta R}{|B|(1-\rho^m)} \leq \frac{2\eta R}{|B|(1-\rho^m)} \quad (7)$$

since  $0 < \rho < 1$ . Recall that  $\rho = \max\{|1 - \eta\mu|, |1 - \eta L|\}$ . We see that  $\rho$  is a function of step size  $\eta$ , and the value of  $\eta$  can be optimized to minimize  $\rho$  (i.e., to obtain the maximum contraction). It can be seen that  $\rho$  has the minimum value of  $\frac{L-\mu}{L+\mu}$  when  $\eta = \frac{2}{L+\mu}$ , which is when  $|1 - \eta\mu| = |1 - \eta L|$ . Plugging  $\rho = \frac{L-\mu}{L+\mu}$  and  $m = 1$  into (7), we obtain the second claim.  $\square$

**Proposition 3.** *Algorithm 3 with averaging satisfies  $(\alpha, \epsilon)$ -RDP, where*

$$\epsilon = \frac{1}{\alpha-1} \log \left( \frac{1}{m} \sum_{j=1}^m e^{\frac{\alpha(\alpha-1)(\Delta[j])^2}{2\sigma^2}} \right).$$

*Proof.* Let  $D$  and  $D'$  be neighboring databases. Let  $\mathcal{M}_j$  be a mechanism with associated sensitivity  $\Delta[j]$ . Given the randomly permuted input dataset, Algorithm 3, denoted by  $\mathcal{M}$ , chooses  $\mathcal{M}_j$  with probability  $q[j] = 1/m$  and releases the output using the Gaussian mechanism with noise scale parameter  $\sigma$ . We show that the Rényi divergence between the output distributions of  $\mathcal{M}$  is bounded by  $\epsilon$ .

$$\begin{aligned} D_\alpha(\mathcal{M}(D) \parallel \mathcal{M}(D')) &= \frac{1}{\alpha-1} \log H_\alpha(\mathcal{M}(D); \mathcal{M}(D')) \\ &\leq \frac{1}{\alpha-1} \log \left( \sum_{j=1}^m q[j] H_\alpha(\mathcal{M}_j(D); \mathcal{M}_j(D')) \right) \\ &= \frac{1}{\alpha-1} \log \left( \frac{1}{m} \sum_{j=1}^m e^{(\alpha-1) D_\alpha(\mathcal{M}_j(D) \parallel \mathcal{M}_j(D'))} \right) \\ &\leq \frac{1}{\alpha-1} \log \left( \frac{1}{m} \sum_{j=1}^m e^{\alpha(\alpha-1) \Delta[j]^2 / 2\sigma^2} \right), \end{aligned}$$

where the first and second inequalities are due to Lemmas 3 and 1, respectively.  $\square$

## B KDDCup99 Dataset

To demonstrate the performance on a large dataset, we evaluate the proposed algorithm on KDDCup99 dataset. Figure 4 shows the performance for LR and SVM. For LR, output perturbation methods perform better when  $\epsilon$  is small while gradient perturbation methods outperform when  $\epsilon$  is large. While OutPert-GD perform very poorly on other 4 datasets, it shows a comparable performance on the large dataset. This is because its sensitivity is inversely proportional to the dataset size.

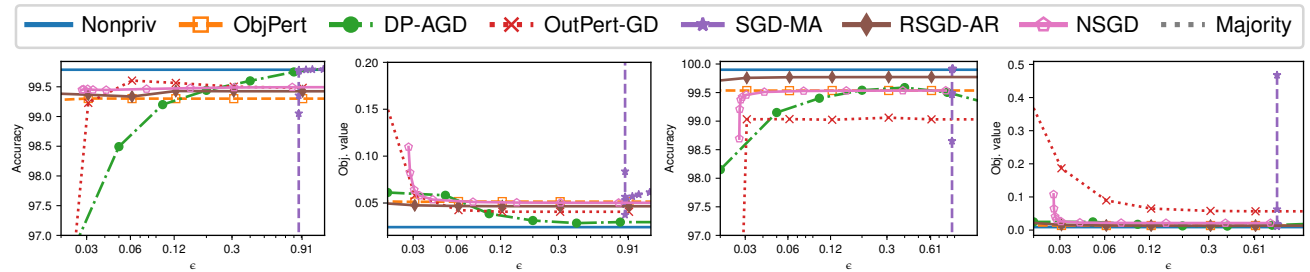

Figure 4: Performance on KDDCup99 dataset (Left: LR, Right: SVM)
